# Supplementary material for: Structure-based design and characterization of Parkin-activating mutations
Source: Life Sci Alliance. 2023 Mar 20;6(6):e202201419. doi: 10.26508/lsa.202201419 (PMC10027901; doi:10.26508/lsa.202201419)
Supplement: Supplementary file 1 [file LSA-2022-01419_TableS1.xlsx]

## Sheet: Sheet1
Table S1. Yields of recombinant Parkin mutants, expressed in E. coli
Parkin Mutation	mg per litre (human)	mg per litre (rat)
WT	0.3-0.6	7.14
R33Q	0.16	1.9
S65A	0.191	-
Y143D	0.257	2.61
Y143E	0.138	1.42
F146A	0.248	3.13
W183Y	0.687	1.45
F208Y	0.15	1.96
H227N	0.208	-
H227A (human) / N227A (rat)	0.265	0.58
L266K	0.153	1.824
L266R	0.15	1.1
N273K	0.162	1.87
E300A	0.163	1.19
E300Q	0.327	1.6
E370A	0.32	1.44
V393D	0.162	1.38
V393K	0.225	0.98
A397D	0.216	1.97
A397K	0.245	2.72
A398T	0.15	1.12
A398D	0.037	1.38
A398E	-	2.35
A398K	0.078	1.62
A401D	0.143	1.5
A401K	0.087	1.43
W403A	0.036	1.87
W403F	0.18	1.16
C431F	0.195	-
W462A	0.218	1.98
W462F	0.231	1.48
W462Y	0.142	2.65
F463Y	0.225	1.04
D464A	0.727	1.53
D464E	0.129	2.39
D464K	0.487	1.37
